# Supplementary material for: Lipid storage myopathy associated with sertraline treatment is an acquired mitochondrial disorder with respiratory chain deficiency
Source: PubMed Central journal article supplement (PMC11588938; doi:10.1007/s00401-024-02830-x), 2024-11-26
Supplement: 401_2024_2830_MOESM1_ESM.pdf [file 401_2024_2830_MOESM1_ESM.pdf]

+

## **Supplementary information**

### **Lipid storage myopathy associated with sertraline treatment is an acquired mitochondrial disorder with respiratory chain deficiency**

Carola Hedberg-Oldfors<sup>1</sup>, Ulrika Lindgren<sup>1,2</sup>, Kittichate Visuttijai<sup>1</sup>, Yan Shen<sup>1</sup>, Andreea Ilinca<sup>3,4</sup>, Sara Nordström<sup>2</sup>, Christopher Lindberg<sup>2</sup> and Anders Oldfors<sup>1</sup>

<sup>1</sup> Department of Laboratory Medicine, University of Gothenburg, Gothenburg, Sweden

<sup>2</sup> Neuromuscular Centre, Department of Neurology, Sahlgrenska University Hospital, Gothenburg, Sweden

<sup>3</sup> Department of Neurology, Skåne University Hospital, Division of Neurology, Lund, Sweden

<sup>4</sup> Department for Clinical Sciences, Lund University, Lund, Sweden.

Corresponding author: Anders Oldfors; Department of Laboratory Medicine, University of Gothenburg, Gothenburg, Sweden

Address: Sahlgrenska University Hospital, Gula stråket 8, 413 45 Gothenburg, Sweden, phone number +46 31 342 2084, e-mail: anders.oldfors@gu.se

## Material and Methods

**Supplementary Table 1.** Detailed laboratory findings in all patients

| Patient | Acylcarnitines, free carnitine (C0)                                                                                          | U-organic acids                                                                                          | Lactic acid (serum) (0,5-1,7 mmol/L)                                                                                                                                      |
|---------|------------------------------------------------------------------------------------------------------------------------------|----------------------------------------------------------------------------------------------------------|---------------------------------------------------------------------------------------------------------------------------------------------------------------------------|
| 1       | Increased C12, C14, C16, C18, and C18:1, slightly reduced C0 (20 days after biopsy)                                          | No pathological excretion                                                                                | <b>1.9</b> (3 month after biopsy)<br>1.4 (14 month after biopsy)<br>1.5 (16 month after biopsy)<br><b>2.0</b> (3 years after biopsy)<br><b>2.2</b> (7 years after biopsy) |
| 2       | Increased C6, C8, C10, C12, C14, C16, C14:1, C18:1 and C18 (25 days after biopsy)                                            |                                                                                                          | <b>3.2</b> (3 month after biopsy)                                                                                                                                         |
| 3       | Carnitine deficiency with low concentration of C0 and total carnitines (same day as biopsy)                                  |                                                                                                          |                                                                                                                                                                           |
| 4       | Increased C4, C6, C10, C12, C14, C16, C14:1, C18:1 and C18, slightly reduced C0 (30 days after biopsy)                       | Increased excretion of ethylmalonic acid (EMA) and 2-hydroxyglutaric acid (2-HGA) (35 days after biopsy) | 1.3 (4 month after biopsy)                                                                                                                                                |
| 5       | Increased C6, C8, C10 and C12 (1 month after biopsy)<br>Increased C4, C6, C8, C10, C12, C14 and C14:1 (2 month after biopsy) |                                                                                                          |                                                                                                                                                                           |
| 6       | Increased C4, C6, C10, C12, C14, C16, C14:1, C18:1 and C18 (7 days before biopsy)                                            | Increased excretion of EMA and 2-HGA, adipic acids and isovaleryglycine (7 days before biopsy)           |                                                                                                                                                                           |
| 7       | Carnitine deficiency with low concentration of C0 and total carnitines (3 days after biopsy)                                 | No pathological excretion (23 days after biopsy)                                                         |                                                                                                                                                                           |
| 8       | Increased C6, C8, C10, C12, C14, C16, C14:1, C14:2, C18:1, C18 and C5DC (8 month after biopsy)                               |                                                                                                          |                                                                                                                                                                           |
| 9       | Increased C12 (1.5 month after biopsy), Increased C12, C14 and C14:1 (6 month after biopsy)                                  | No pathological excretion (6 month after biopsy)                                                         | 1.2 (6 month after biopsy)                                                                                                                                                |
| 10      | Increased C6, C8, C10, C12, C14, C16, C14:1, C18:1 (4 month after biopsy)                                                    | No pathological excretion (4 month after biopsy)                                                         | 1.2 (4 month after biopsy)                                                                                                                                                |
| 11      | Increased C4, C5, C6, C8, C10, C12, C14, C16, C14:1, C14:2, C18:1, C18 and C5DC (1.5 month after biopsy)                     | No pathological excretion (1,5 month after biopsy)                                                       | <b>3.1</b> (1.5 month after biopsy)                                                                                                                                       |

**Supplementary Table 2.** A summary of controls used in this study

| <b>Method</b>              | <b>Muscle biopsy findings</b>                                                                  | <b>Age at biopys (Y)</b> | <b>Sex</b> |
|----------------------------|------------------------------------------------------------------------------------------------|--------------------------|------------|
| <i>Western blot</i>        |                                                                                                |                          |            |
| DC1                        | Muscle biopsy with lipid storage (MADD, <i>ETFDH</i> )                                         | 25                       | M          |
| DC2                        | Muscle biopsy with lipid storage (Neutral lipid storage disease with myopathy, <i>PNPLA2</i> ) | 43                       | F          |
| C1                         | Normal muscle biopsy                                                                           | 22                       | M          |
| C2                         | Normal muscle biopsy                                                                           | 45                       | F          |
| C3                         | Normal muscle biopsy                                                                           | 58                       | F          |
| <i>Proteomic profiling</i> |                                                                                                |                          |            |
| C1                         | Normal muscle biopsy                                                                           | 52                       | M          |
| C2                         | Same as C1 in western blot                                                                     | 22                       | M          |
| C3                         | Normal muscle biopsy                                                                           | 61                       | M          |
| C4                         | Normal muscle biopsy                                                                           | 48                       | M          |
| C5                         | Same as C2 in western blot                                                                     | 45                       | F          |
| C6                         | Normal muscle biopsy                                                                           | 43                       | F          |
| C7                         | Normal muscle biopsy                                                                           | 26                       | F          |
| C8                         | Same as C3 in western blot                                                                     | 58                       | F          |

Y, year; F, female; M, Male; DC, disease control; C, control (from individuals who had been investigated for a possible muscle disorder, but in whom investigations excluded muscle disease)

*Immunofluorescence analysis of respiratory chain Complexes I, II and IV*

Cryosections from each patient were divided into two separate staining sets: one set included complexes I, II, VDAC1, and perlecan and the other set included complexes I, IV, VDAC1, and perlecan. The sections were fixed in 4% formaldehyde in 0.1 M phosphate buffer for 10 minutes at 4°C, then rinsed with water three times and washed in Tris-buffered saline with Tween 20 (TBS-T) for 10 minutes. Permeabilisation was carried out through a graded methanol series (70% 2 minutes, 95% 2 minutes, 100% 10 minutes, 95% 2 minutes, and 70% 2 minutes), followed by another wash in TBS-T for 5 minutes. The sections were subsequently processed using a Dako Autostainer, where the sections were blocked with 10% normal goat serum before incubating with the primary antibodies and the corresponding fluorochrome-conjugated secondary antibodies (Supplementary Table 2).

All slides were scanned using a Hamamatsu S60 digital scanner with fluorescence equipment, including a DAPI/FITC/TRITC/Cy5 quad-band filter set (Semrock, New York). Results from studies using this assay on biochemically and genetically verified cases with isolated Complex I and IV deficiency and well characterized and genetically defined patients with combined complex I and IV deficiency are shown in Supplementary Fig 1.



**Supplementary Table 3.** Antibodies for immunofluorescence and western blot analyses

| <b>Antigen</b><br>(Isotype/Conjugation)                        | <b>Host</b> | <b>Dilution</b> |        |        | <b>Manufacturer</b><br>(Catalogue Number) |
|----------------------------------------------------------------|-------------|-----------------|--------|--------|-------------------------------------------|
|                                                                |             | MIFA            | MITIF  | WB     |                                           |
| <i>Primary antibodies</i>                                      |             |                 |        |        |                                           |
| <b>NDUFB8 (Complex I)</b><br>(IgG1)                            | Mouse       |                 | 1:200  | 1:1000 | Abcam (ab110242)                          |
| <b>SDHB (Complex II)</b><br>(IgG2a)                            | Mouse       |                 | 1:200  | 1:1000 | Abcam (ab14714)                           |
| <b>UQCRC2 (Complex III)</b><br>(IgG1)                          | Mouse       |                 |        | 1:2000 | Abcam (ab14745)                           |
| <b>MTCO1 (Complex IV)</b><br>(IgG2a)                           | Mouse       |                 | 1:200  | 1:1000 | Abcam (ab14705)                           |
| <b>ATPB (Complex V)</b><br>(IgG1)                              | Mouse       |                 |        | 1:2000 | Abcam (ab14730)                           |
| <b>VDAC1 (Porin)</b><br>(IgG2b)                                | Mouse       |                 | 1:1000 |        | Abcam (ab14734)                           |
| <b>VDAC1</b><br>(IgG)                                          | Rabbit      |                 |        | 1:1000 | Cell Signaling Technology (4661)          |
| <b>MYH7 (MyHC I)</b><br>(IgG2b)                                | Mouse       | 1:50            |        |        | DSHB (BA-D5)                              |
| <b>MYH2 (MyHC IIa)</b><br>(IgG1)                               | Mouse       | 1:50            |        |        | DSHB (SC-71)                              |
| <b>MYH1 (MyHC IIx)</b><br>(IgM)                                | Mouse       | 1:10            |        |        | DSHB (6H1)                                |
| <b>Heparan Sulfate<br/>Proteoglycan (Perlecan)</b><br>(IgG2aκ) | Rat         | 1:200           | 1:1000 |        | Merck (MAB1948P)                          |
| <i>Secondary antibodies</i>                                    |             |                 |        |        |                                           |
| <b>Mouse IgG</b><br>(HRP)                                      | Goat        |                 |        | 1:1000 | ThermoFisher Scientific (32430)           |
| <b>Rabbit IgG</b><br>(HRP)                                     | Goat        |                 |        | 1:1000 | ThermoFisher Scientific (32460)           |
| <b>Mouse IgG1</b><br>(Alexa Fluor 488)                         | Goat        | 1:200           | 1:200  |        | ThermoFisher Scientific (A-21121)         |
| <b>Mouse IgM (H)</b><br>(Alexa Fluor 647)                      | Goat        | 1:200           |        |        | ThermoFisher Scientific (A-21238)         |
| <b>Mouse IgG2a</b><br>(Alexa Fluor 647)                        | Goat        |                 | 1:100  |        | ThermoFisher Scientific (A-21241)         |
| <b>Mouse IgG2b</b><br>(Brilliant Violet 421)                   | Goat        | 1:200           | 1:100  |        | Jackson ImmunoResearch (115-675-207)      |
| <b>Rat IgG (H+L)</b><br>(Alexa Fluor 568)                      | Goat        | 1:200           | 1:250  |        | ThermoFisher Scientific (A-11077)         |

HRP: Horseradish peroxidase

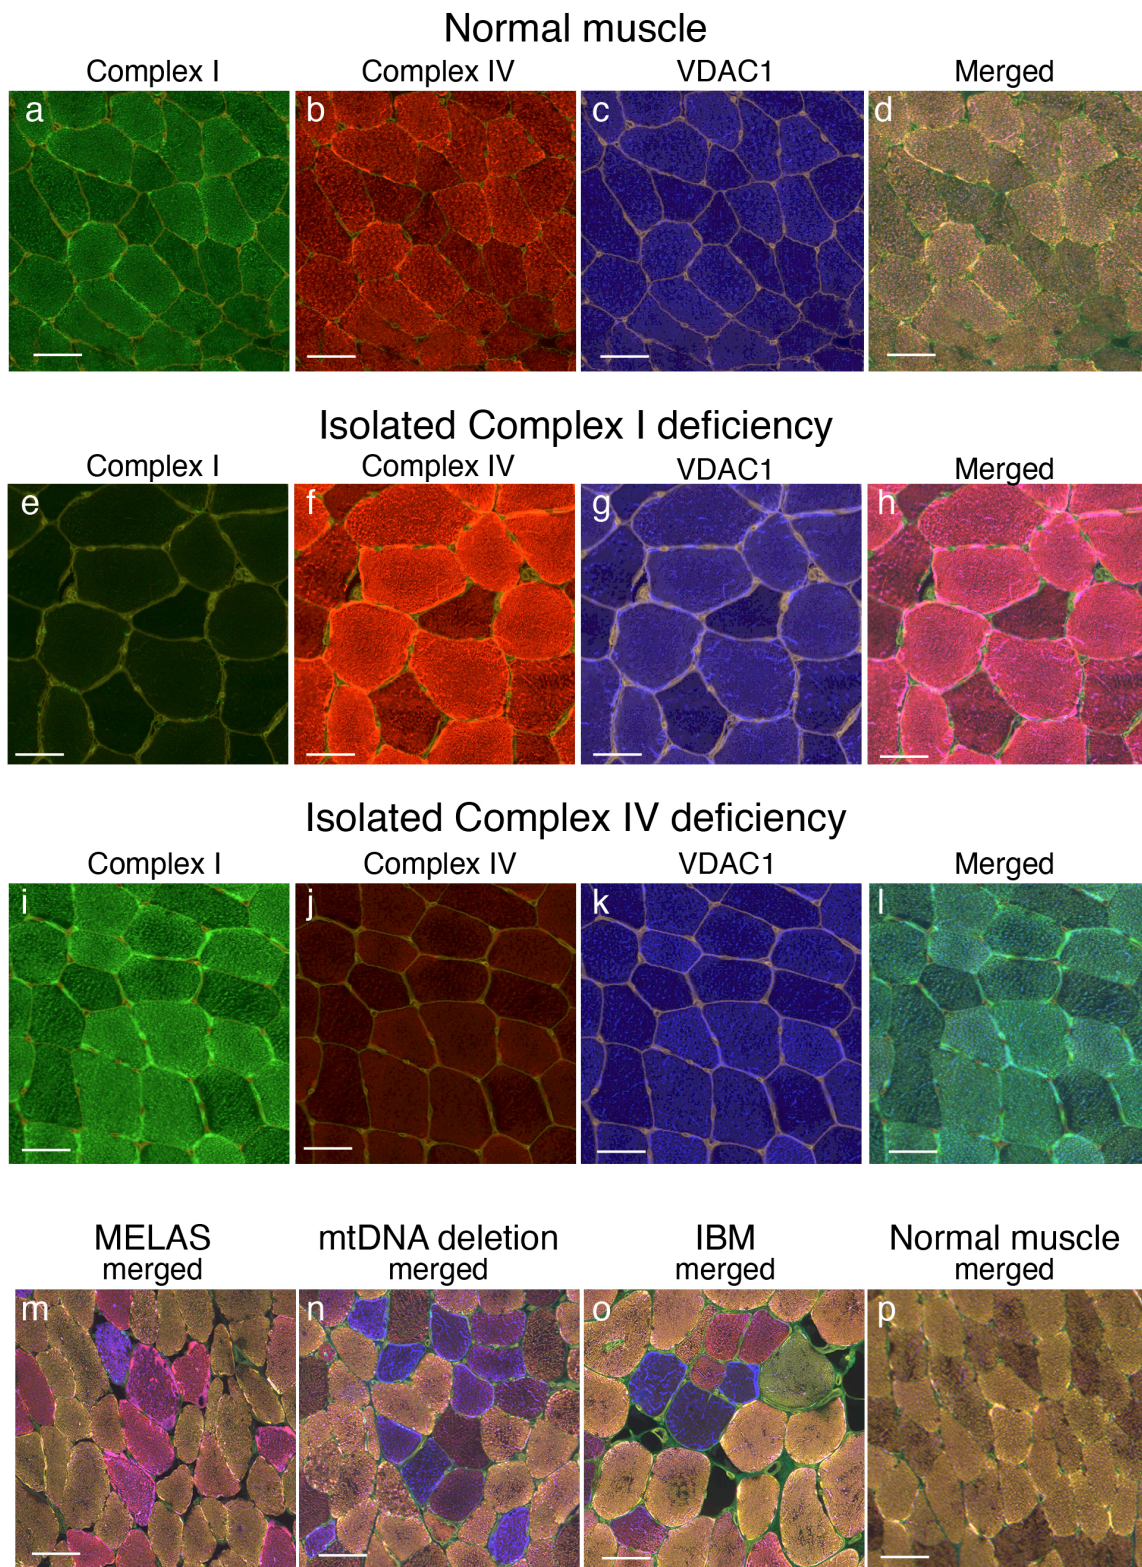

**Supplementary Fig 1.** Quadruple immunofluorescence assay applied on well characterized diseases and normal muscle. In merged illustrations yellow fibers are normal, red fibers are Complex I deficient, green fibers are Complex IV deficient and blue fibers are deficient of both Complex I and IV. a-d) Normal muscle. e-h) Patient with isolated Complex I deficiency (Darin et al. *Eur J Neurol.* 2017;24:587-93). i-l) Patient with isolated Complex IV analysis (Roos et al. *Eur J Hum Genet.* 2019;27:331-5). m) mtDNA variant m.3243A>G associated with mitochondrial encephalomyopathy lactic acidosis and stroke-like periods (MELAS). n) Single large scale mtDNA deletion o) Multiple large and small deletions in inclusion body myositis (IBM). p) Normal control. Bars = 50  $\mu$ m.

## **Proteomic Liquid Chromatography-Mass Spectrometry (LC-MS<sup>3</sup>) analysis**

### *Sample preparation*

Proteins were extracted in 2% sodium dodecyl sulfate and 100 mM triethylammonium bicarbonate (TEAB) using a Covaris ML230 ultrasonicator. Protein concentrations were determined using Pierce BCA Protein Assay Kit (Thermo Scientific) on a SpectraMax iD3 microplate reader (Molecular Devices). Samples (40 µg) were processed using a modified SP3 method. Samples were reduced in 10mM dithiothreitol at 56°C for 30min and alkylated in 20mM iodoacetamide at room temperature for 30min. Washed hydrophobic and hydrophilic Sera-Mag<sup>TM</sup> SpeedBeads (Carboxylate-Modified, by Cytiva) were added to the samples with a bead to protein ratio of 18:1. Proteins were precipitated on the beads by ethanol (final concentration 70%), washed twice with 70% ethanol, followed by wash with 100% acetonitrile, dried at room temperature. Beads were resuspended in 50mM TEAB and proteins were digested with Trypsin/Lys-C mix (1:25, Promega) for two hours, followed by trypsin (1:50, Promega) overnight. The magnetic beads were removed, and samples were labelled using TMTpro 18-plex isobaric mass tagging reagents (Ref#: A52045; Lot#: XI346567 and XJ346678, Thermo Fisher Scientific). The labelled samples were pooled and purified using HiPPR Detergent Removal Resin and Pierce peptide desalting spin columns (both Thermo Scientific), according to the manufacturer's instructions. The TMT-set was fractionated by basic reversed-phase chromatography on a Dionex Ultimate 3000 UPLC system (Thermo Fisher Scientific). Peptide separations were performed using a reversed-phase XBridge BEH C18 column (3.5 µm, 2.1x250 mm, Waters Corporation) and a stepped gradient from 3% to 80% solvent B over 90 min at a flow of 200 µL/min. Solvent A was 25mM ammonia and solvent B was 85% acetonitrile. Fractions (96) were collected from 20-74 minutes and combined into 36 final fractions. Fractions were evaporated and reconstituted in 3% acetonitrile, 0.1% trifluoroacetic and 0.015% dodecyl-β-D-maltoside for LC-MS<sup>3</sup> analysis.

### *LC-MS<sup>3</sup> analysis*

The fractions were analysed on an Orbitrap Lumos<sup>TM</sup> Tribrid<sup>TM</sup> mass spectrometer equipped with a FAIMS Pro ion mobility system and interfaced with an Easy-nLC1200 liquid chromatography system (all Thermo Fisher Scientific). Peptides were trapped on an Acclaim Pepmap 100 C18 trap column (100 µm x 2 cm, particle size 5 µm, Thermo Fisher Scientific) and separated on an in-house packed analytical column (35 cm x 75 µm, particle size 3 µm, Reprosil-Pur C18, Dr. Maisch) using a stepped gradient from 5% to 35% B over 77 min at a flow of 300 nL/min (Solvent A 0.2% formic acid, solvent B 80% ACN and 0.2% formic acid). FAIMS Pro was alternating between the compensation voltages (CV) of -50 and -70, and the same data-dependent settings were used at both CVs. The precursor ion mass spectra were acquired at a resolution of 120 000 and an m/z range of 375-1375. Using a cycle time of 1.5 seconds the most abundant precursors with charges 2–7 were isolated with an m/z window of 0.7 and fragmented by collision-induced dissociation (CID) at 35%. Fragment spectra were recorded in the ion trap at a Rapid scan rate. Dynamic exclusion was set to 60 sec. The ten most abundant MS<sup>2</sup> fragment ions were isolated using multi-notch isolation for further MS<sup>3</sup> fragmentation. MS<sup>3</sup> fragmentation was performed using higher-energy collision dissociation (HCD) at 55% and the MS<sup>3</sup> spectra were recorded in the Orbitrap at 50 000 resolution and an m/z range of 100–500.

### *Proteomic data analysis*

Raw files were processed and analyzed with Proteome Discoverer (ver 3.0, Thermo Fisher Scientific) The data was matched against *Human* SwissProt database (20597 entries, February 2024) using Sequest as a search engine

with a precursor tolerance of 5 ppm and a fragment ion tolerance of 0.6 Da. Tryptic peptides were accepted with 1 missed cleavage. Methionine oxidation and acetylation on protein N-termini was set as variable modifications and cysteine carbamidomethylation, TMTpro on lysine and peptide N-termini were set as fixed modifications. Percolator was used for PSM validation with a strict FDR threshold of 1%. For quantification TMT reporter ions were identified in the MS<sup>3</sup> HCD spectra with 3 mmu mass tolerance and the TMT reporter intensity values for each sample were normalized on the total peptide amount. The SPS threshold was set to 65%, a Sequest HT threshold score of 2 was chosen. Only unique peptides were used for relative quantification and proteins were required to pass a protein FDR of 1%.

#### *Quantitative LC-MS<sup>3</sup> proteomic analysis and illustration by volcano plots*

For quantitative LC-MS<sup>3</sup> proteomic analysis and illustration by volcano plots of the respiratory chain Complex I-V, the beta-oxidation of fatty acids (FAO) and the citric acid cycle (TCA), genes were selected based on “MitoCarta3.0: An Inventory of Mammalian Mitochondrial Proteins and Pathways” (<https://www.broadinstitute.org/mitocarta/mitocarta30-inventory-mammalian-mitochondrial-proteins-and-pathways>).

### **Complex I**

#### CI subunits

MT-ND1, MT-ND2, MT-ND3, MT-ND4, MT-ND4L, MT-ND5, MT-ND6, NDUFA1, NDUFA10, NDUFA11, NDUFA12, NDUFA13, NDUFA2, NDUFA3, NDUFA5, NDUFA6, NDUFA7, NDUFA8, NDUFA9, NDUFAB1, NDUFB1, NDUFB10, NDUFB11, NDUFB2, NDUFB3, NDUFB4, NDUFB5, NDUFB6, NDUFB7, NDUFB8, NDUFB9, NDUFC1, NDUFC2, NDUFS1, NDUFS2, NDUFS3, NDUFS4, NDUFS5, NDUFS6, NDUFS7, NDUFS8, NDUFV1, NDUFV2, NDUFV3

#### CI assembly factors

ACAD9, AIFM1, COA1, DMAC1, DMAC2, ECSIT, FOXRED1, LYRM2, NDUFAF1, NDUFAF2, NDUFAF3, NDUFAF4, NDUFAF5, NDUFAF6, NDUFAF7, NDUFAF8, NUBPL, TIMMDC1, TMEM126A, TMEM126B, TMEM186, TMEM70

### **Complex II**

#### CII subunits

SDHA, SDHB, SDHC, SDHD

#### CII assembly factors

SDHAF1, SDHAF2, SDHAF4, SDHAF3

### **Complex III**

#### CIII subunits

CYC1, MT-CYB, UQCR10, UQCR11, UQCRB, UQCRC1, UQCRC2, UQCRFS1, UQCRH, UQCRQ

#### CIII assembly factors

BCS1L, LYRM7, TTC19, UQCC1, UQCC2, UQCC3

### **Complex IV**

#### CIV subunits

COX4I1, COX4I2, COX5A, COX5B, COX6A1, COX6A2, COX6B1, COX6B2, COX6C, COX7A1, COX7A2, COX7A2L, COX7B, COX7B2, COX7C, COX8A, COX8C, MT-CO1, MT-CO2, MT-CO3, NDUFA4

#### CIV assembly factors

CEP89, CMC1, CMC2, COA1, COA3, COA4, COA5, COA6, COA7, COA8, COX10, COX11, COX14, COX15, COX16, COX17, COX18, COX19, COX20, HIGD1A, PET100, PET117, PNKD, SCO1, SCO2, SMIM20, SURF1, TACO1, TIMM21, TMEM177

### **Complex V**

#### CV subunits

ATP5F1A, ATP5F1B, ATP5F1C, ATP5F1D, ATP5F1E, ATP5IF1, ATP5MC1, ATP5MC2, ATP5MC3, ATP5MD, ATP5ME, ATP5MF, ATP5MG, ATP5MPL, ATP5PB, ATP5PD, ATP5PF, ATP5PO, DMAC2L, MT-ATP6, MT-ATP8

#### CV assembly factors

ATPAF1, ATPAF2, ATPSCKMT, FMC1, TMEM70

#### FAO - Fatty Acid Oxidation

DECR1, HSD17B10, ACAA2, ACAT1, ACACB, ACSS1, ACOT11, AMACR, CRAT, CPT1A, CPT1B, CPT2, ETFA, ETFB, ETFDH, ECI1, ECI2, ECHS1, HADH, ACSL1, ACSF2, ACADM, MCEE, MMUT, SLC25A20, CROT, PCCA, PCCB, ACADS, ACADSB, HADHA, HADHB, ACADVL

#### TCA - citric acid cycle

OGDH, ACO2, FAHD1, ACLY, CS, D2HGDH, DLD, DLST, FH, IDH3A, IDH3B, IDH3G, IDH2, L2HGDH, MDH2, SLC25A11, MPC1, MPC2, ME2, ME3, PCK2, PC, ABHD11, SUCLA2, SUCLG1, SUCLG2, SLC25A1



## Results

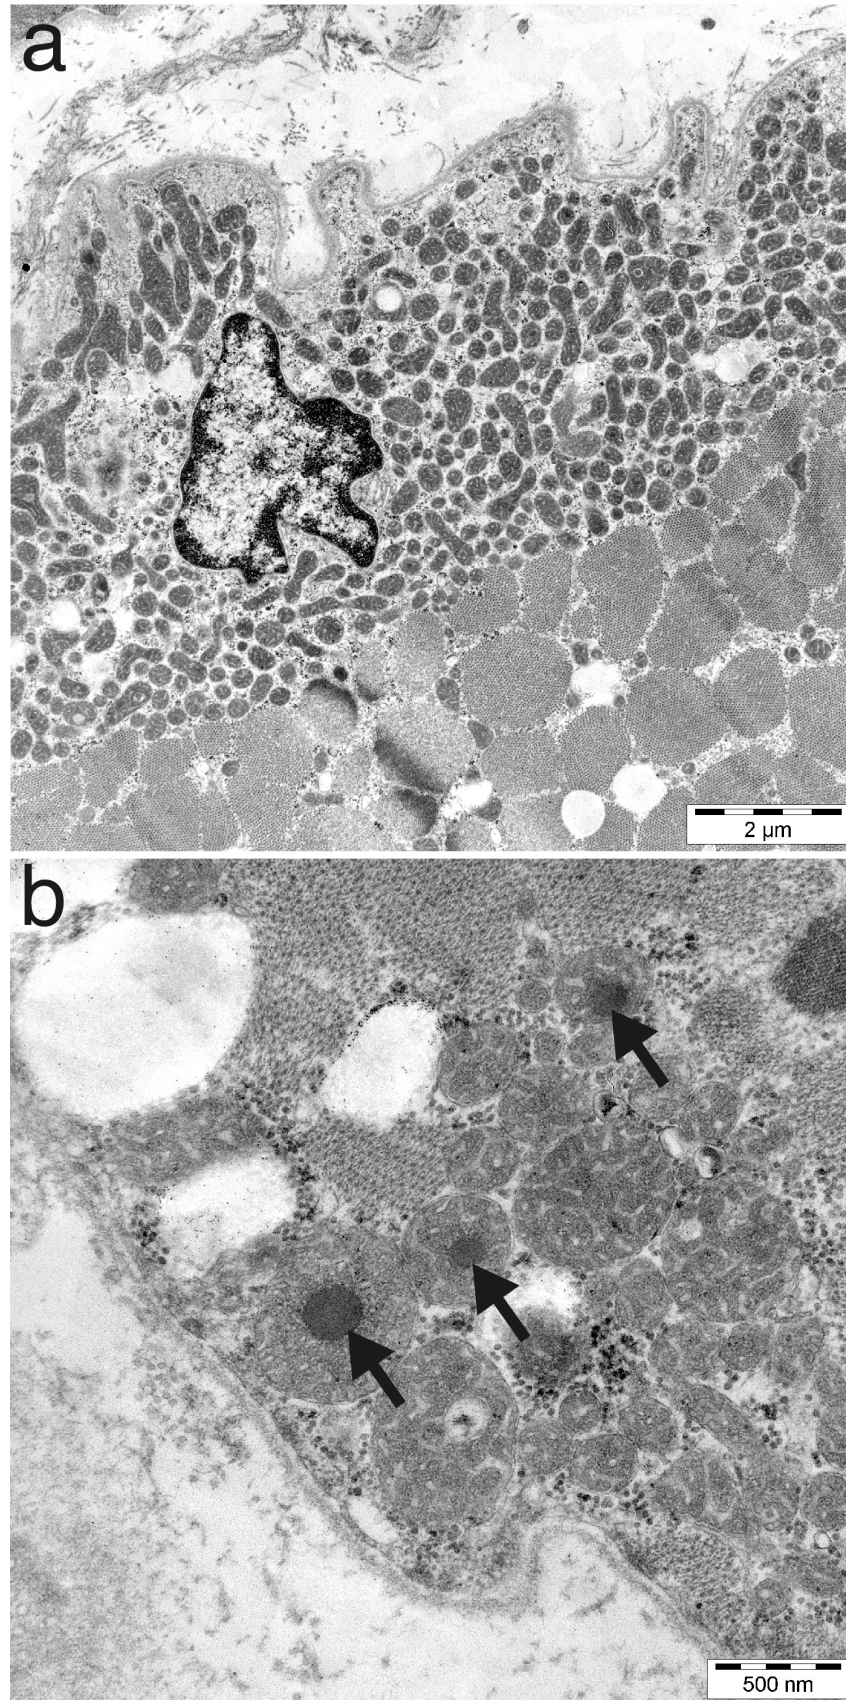

**Supplementary Fig 2.** Electron micrograph of muscle tissue in one patient (P1). a) Subsarcolemmal accumulation of pleomorphic mitochondria with dens matrix causing an overall dark appearance of the mitochondria. b) Some of the mitochondria show dark, round inclusions (arrows).



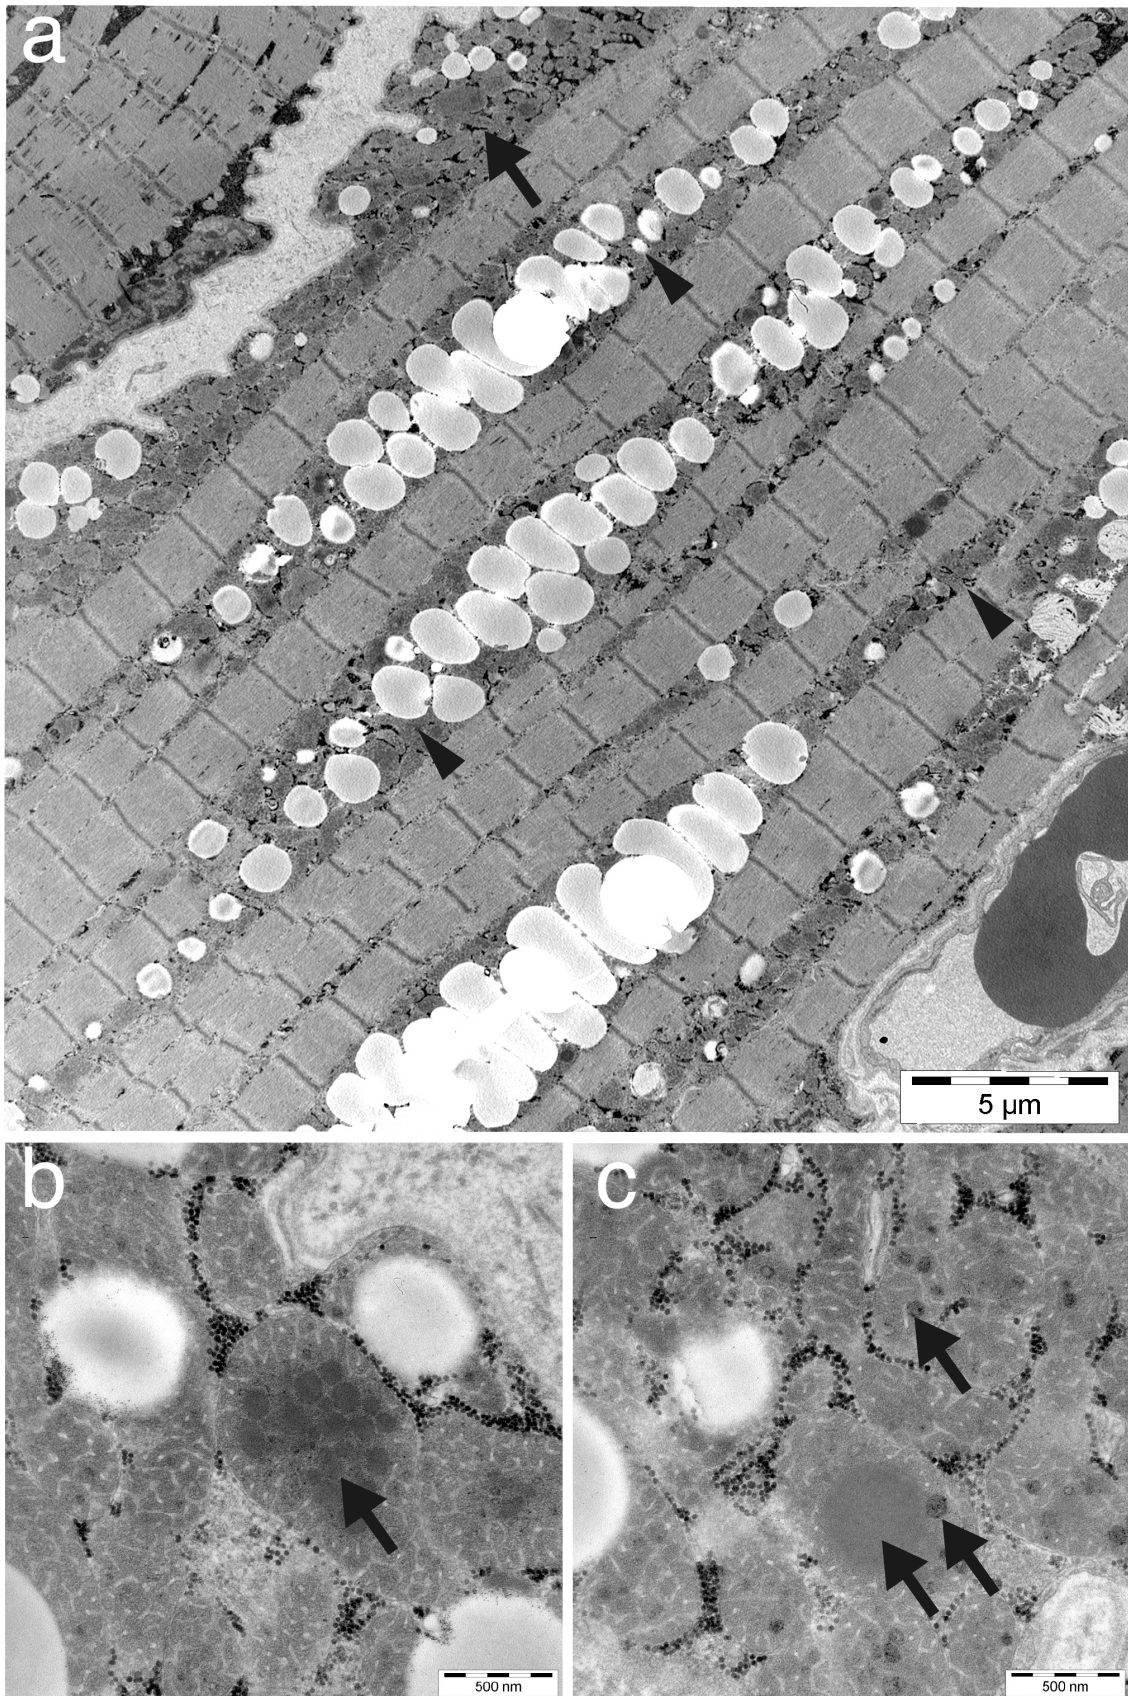

**Supplementary Fig 3.** Electron micrograph of muscle tissue in one patient (P2). a) The accumulation of mitochondria with electron-dense matrix causing an overall dark appearance. They are located in the sub-sarcolemmal region (arrow) as well as in the intermyofibrillar compartment associated with lipid storage (arrow heads). b and c) Many of the mitochondria show electron dense, round inclusions of various sizes (arrows).



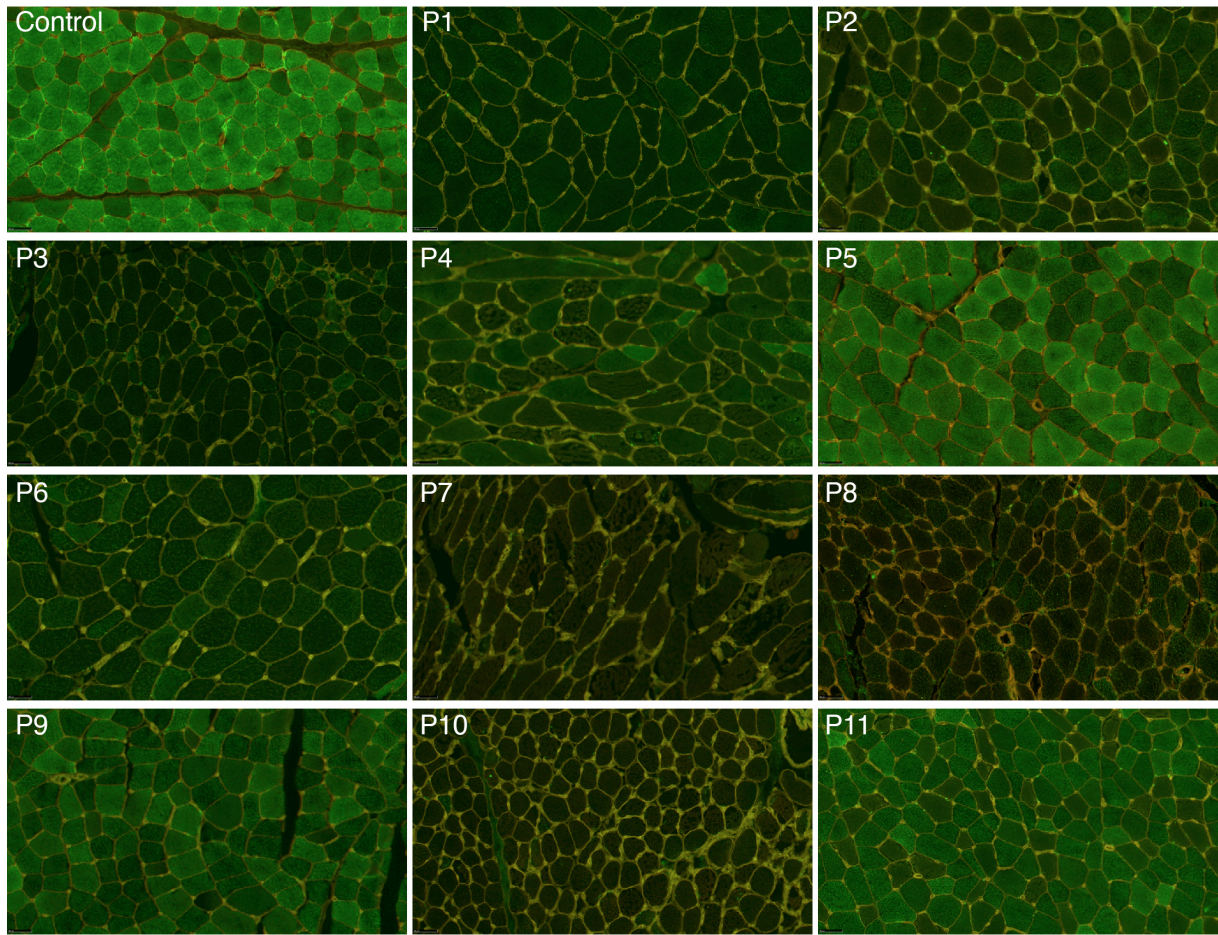

**Supplementary Fig 4.** Complex I activity (NDUFB8 immunofluorescence, green colour) in single muscle fibers. One control and 11 patients (P1-11). The Complex I immunofluorescence is reduced in all patients. Yellow color corresponds to perlecan, a basement membrane protein.



**Supplementary Table 4.** List of proteins detected in subunits and assembly factors for complex I – V in the proteomic analysis

| Gene Symbol                | UniProt Accession | Description                                                                    | Unique Peptides | log2 FC | FDR  |
|----------------------------|-------------------|--------------------------------------------------------------------------------|-----------------|---------|------|
| <b>CI subunits</b>         |                   |                                                                                |                 |         |      |
| NDUFV3                     | P56181            | NADH dehydrogenase [ubiquinone] flavoprotein 3, mitochondrial                  | 2               | -1.88   | 0.00 |
| NDUFC1                     | O43677            | NADH dehydrogenase [ubiquinone] 1 subunit C1, mitochondrial                    | 2               | -1.69   | 0.00 |
| NDUFS6                     | O75380            | NADH dehydrogenase [ubiquinone] iron-sulfur protein 6, mitochondrial           | 7               | -1.65   | 0.00 |
| NDUFA7                     | O95182            | NADH dehydrogenase [ubiquinone] 1 alpha subcomplex subunit 7                   | 4               | -1.64   | 0.00 |
| NDUFB4                     | O95168            | NADH dehydrogenase [ubiquinone] 1 beta subcomplex subunit 4                    | 4               | -1.63   | 0.00 |
| NDUFS4                     | O43181            | NADH dehydrogenase [ubiquinone] iron-sulfur protein 4, mitochondrial           | 3               | -1.63   | 0.00 |
| NDUFA2                     | O43678            | NADH dehydrogenase [ubiquinone] 1 alpha subcomplex subunit 2                   | 5               | -1.62   | 0.00 |
| MT-ND4                     | P03905            | NADH-ubiquinone oxidoreductase chain 4                                         | 1               | -1.61   | 0.00 |
| NDUFA10                    | O95299            | NADH dehydrogenase [ubiquinone] 1 alpha subcomplex subunit 10, mitochondrial   | 14              | -1.6    | 0.00 |
| NDUFA11                    | Q86Y39            | NADH dehydrogenase [ubiquinone] 1 alpha subcomplex subunit 11                  | 5               | -1.58   | 0.00 |
| NDUFA9                     | Q16795            | NADH dehydrogenase [ubiquinone] 1 alpha subcomplex subunit 9, mitochondrial    | 16              | -1.57   | 0.00 |
| NDUFB8                     | O95169            | NADH dehydrogenase [ubiquinone] 1 beta subcomplex subunit 8, mitochondrial     | 4               | -1.56   | 0.00 |
| NDUFA12                    | Q9UI09            | NADH dehydrogenase [ubiquinone] 1 alpha subcomplex subunit 12                  | 7               | -1.56   | 0.00 |
| NDUFB7                     | P17568            | NADH dehydrogenase [ubiquinone] 1 beta subcomplex subunit 7                    | 6               | -1.56   | 0.00 |
| NDUFV1                     | P49821            | NADH dehydrogenase [ubiquinone] flavoprotein 1, mitochondrial                  | 15              | -1.51   | 0.00 |
| NDUFS1                     | P28331            | NADH-ubiquinone oxidoreductase 75 kDa subunit, mitochondrial                   | 35              | -1.5    | 0.00 |
| NDUFS5                     | O43920            | NADH dehydrogenase [ubiquinone] iron-sulfur protein 5                          | 7               | -1.48   | 0.00 |
| NDUFB9                     | Q9Y6M9            | NADH dehydrogenase [ubiquinone] 1 beta subcomplex subunit 9                    | 6               | -1.48   | 0.00 |
| NDUFB3                     | O43676            | NADH dehydrogenase [ubiquinone] 1 beta subcomplex subunit 3                    | 4               | -1.42   | 0.00 |
| NDUFB1                     | O75438            | NADH dehydrogenase [ubiquinone] 1 beta subcomplex subunit 1                    | 2               | -1.41   | 0.00 |
| NDUFA13                    | Q9P0J0            | NADH dehydrogenase [ubiquinone] 1 alpha subcomplex subunit 13                  | 5               | -1.40   | 0.00 |
| NDUFC2                     | O95298            | NADH dehydrogenase [ubiquinone] 1 subunit C2                                   | 5               | -1.40   | 0.00 |
| NDUFB6                     | O95139            | NADH dehydrogenase [ubiquinone] 1 beta subcomplex subunit 6                    | 4               | -1.36   | 0.00 |
| NDUFA8                     | P51970            | NADH dehydrogenase [ubiquinone] 1 alpha subcomplex subunit 8                   | 6               | -1.32   | 0.00 |
| NDUFB10                    | O96000            | NADH dehydrogenase [ubiquinone] 1 beta subcomplex subunit 10                   | 6               | -1.27   | 0.00 |
| NDUFB5                     | O43674            | NADH dehydrogenase [ubiquinone] 1 beta subcomplex subunit 5, mitochondrial     | 5               | -1.27   | 0.00 |
| NDUFV2                     | P19404            | NADH dehydrogenase [ubiquinone] flavoprotein 2, mitochondrial                  | 9               | -1.26   | 0.00 |
| NDUFA6                     | P56556            | NADH dehydrogenase [ubiquinone] 1 alpha subcomplex subunit 6                   | 4               | -1.19   | 0.00 |
| NDUFB11                    | Q9NX14            | NADH dehydrogenase [ubiquinone] 1 beta subcomplex subunit 11, mitochondrial    | 3               | -1.10   | 0.00 |
| MT-ND3                     | P03897            | NADH-ubiquinone oxidoreductase chain 3                                         | 1               | -1.04   | 0.01 |
| MT-ND5                     | P03915            | NADH-ubiquinone oxidoreductase chain 5                                         | 1               | -0.84   | 0.00 |
| NDUFS2                     | O75306            | NADH dehydrogenase [ubiquinone] iron-sulfur protein 2, mitochondrial           | 13              | -0.82   | 0.00 |
| NDUFS3                     | O75489            | NADH dehydrogenase [ubiquinone] iron-sulfur protein 3, mitochondrial           | 7               | -0.82   | 0.00 |
| NDUFS7                     | O75251            | NADH dehydrogenase [ubiquinone] iron-sulfur protein 7, mitochondrial           | 4               | -0.79   | 0.00 |
| NDUFA5                     | Q16718            | NADH dehydrogenase [ubiquinone] 1 alpha subcomplex subunit 5                   | 4               | -0.78   | 0.00 |
| NDUFS8                     | O00217            | NADH dehydrogenase [ubiquinone] iron-sulfur protein 8, mitochondrial           | 5               | -0.75   | 0.00 |
| NDUFAB1                    | O14561            | Acyl carrier protein, mitochondrial                                            | 2               | 0.20    | 0.4  |
| <b>CI assembly factors</b> |                   |                                                                                |                 |         |      |
| AIFM1                      | O95831            | Apoptosis-inducing factor 1, mitochondrial                                     | 21              | 0.14    | 0.44 |
| NUBPL                      | Q8TB37            | Iron-sulfur cluster transfer protein NUBPL                                     | 4               | 0.14    | 0.70 |
| TMEM126A                   | Q9H061            | Transmembrane protein 126A OS=Homo sapiens                                     | 5               | 0.30    | 0.33 |
| NDUFAF7                    | Q7L592            | Protein arginine methyltransferase NDUFAF7, mitochondrial                      | 1               | 0.51    | 0.11 |
| NDUFAF5                    | Q5TEU4            | Arginine-hydroxylase NDUFAF5, mitochondrial                                    | 2               | 0.74    | 0.01 |
| ACAD9                      | Q9H845            | Complex I assembly factor ACAD9, mitochondrial                                 | 8               | 0.78    | 0.01 |
| NDUFAF2                    | Q8N183            | NADH dehydrogenase [ubiquinone] 1 alpha subcomplex assembly factor 2           | 8               | 0.92    | 0.01 |
| NDUFAF6                    | Q330K2            | NADH dehydrogenase (ubiquinone) complex I, assembly factor 6                   | 3               | 0.92    | 0.01 |
| TMEM70                     | Q9BUB7            | Transmembrane protein 70, mitochondrial                                        | 4               | 0.97    | 0.02 |
| NDUFAF1                    | Q9Y375            | Complex I intermediate-associated protein 30, mitochondrial                    | 1               | 0.97    | 0.00 |
| COA1                       | Q9GZY4            | Cytochrome c oxidase assembly factor 1 homolog                                 | 1               | 0.99    | 0.01 |
| NDUFAF3                    | Q9BU61            | NADH dehydrogenase [ubiquinone] 1 alpha subcomplex assembly factor 3           | 5               | 1.22    | 0.00 |
| ECSIT                      | Q9BQ95            | Evolutionarily conserved signaling intermediate in Toll pathway, mitochondrial | 1               | 1.55    | 0.00 |
| NDUFAF4                    | Q9P032            | NADH dehydrogenase [ubiquinone] 1 alpha subcomplex assembly factor 4           | 8               | 1.57    | 0.00 |
| TIMMDC1                    | Q9NPL8            | Complex I assembly factor TIMMDC1, mitochondrial                               | 2               | 2.02    | 0.02 |
| <b>CII subunits</b>        |                   |                                                                                |                 |         |      |
| SDHD                       | O14521            | Succinate dehydrogenase [ubiquinone] cytochrome b small subunit, mitochondrial | 2               | -0.69   | 0.03 |
| SDHA                       | P31040            | Succinate dehydrogenase [ubiquinone] flavoprotein subunit, mitochondrial       | 25              | -0.62   | 0.01 |
| SDHB                       | P21912            | Succinate dehydrogenase [ubiquinone] iron-sulfur subunit, mitochondrial        | 15              | -0.61   | 0.01 |
| SDHC                       | Q99643            | Succinate dehydrogenase cytochrome b560 subunit, mitochondrial                 | 2               | -0.58   | 0.01 |

|                              |        |                                                                |    |       |      |
|------------------------------|--------|----------------------------------------------------------------|----|-------|------|
| <b>CIII subunits</b>         |        |                                                                |    |       |      |
| MT-CYB                       | P00156 | Cytochrome b                                                   | 1  | -0.02 | 0.89 |
| UQCRFS1                      | P47985 | Cytochrome b-c1 complex subunit Rieske, mitochondrial          | 8  | 0.13  | 0.45 |
| UQCRC2                       | P22695 | Cytochrome b-c1 complex subunit 2, mitochondrial               | 22 | 0.16  | 0.36 |
| UQCRC1                       | P31930 | Cytochrome b-c1 complex subunit 1, mitochondrial               | 18 | 0.17  | 0.29 |
| UQCR10                       | Q9UDW1 | Cytochrome b-c1 complex subunit 9                              | 1  | 0.17  | 0.40 |
| UQCRQ                        | O14949 | Cytochrome b-c1 complex subunit 8                              | 4  | 0.17  | 0.31 |
| UQCRB                        | P14927 | Cytochrome b-c1 complex subunit 7                              | 6  | 0.19  | 0.28 |
| CYC1                         | P08574 | Cytochrome c1, heme protein, mitochondrial                     | 10 | 0.46  | 0.03 |
| UQCRH                        | P07919 | Cytochrome b-c1 complex subunit 6, mitochondrial               | 4  | 0.89  | 0.00 |
| <b>CIII assembly factors</b> |        |                                                                |    |       |      |
| LYRM7                        | Q5U5X0 | Complex III assembly factor LYRM7                              | 3  | 0.02  | 0.94 |
| UQCC2                        | Q9BRT2 | Ubiquinol-cytochrome c reductase complex assembly factor 2     | 2  | 0.95  | 0.00 |
| BCS1L                        | Q9Y276 | Mitochondrial chaperone BCS1                                   | 4  | 1.14  | 0.00 |
| UQCC1                        | Q9NVA1 | Ubiquinol-cytochrome c reductase complex assembly factor 1     | 8  | 1.17  | 0.00 |
| <b>CIV subunits</b>          |        |                                                                |    |       |      |
| MT-CO3                       | P00414 | Cytochrome c oxidase subunit 3                                 | 1  | -0.75 | 0.11 |
| COX7A1                       | P24310 | Cytochrome c oxidase subunit 7A1, mitochondrial                | 2  | -0.71 | 0.01 |
| COX7B                        | P24311 | Cytochrome c oxidase subunit 7B, mitochondrial                 | 1  | -0.70 | 0.01 |
| COX7C                        | P15954 | Cytochrome c oxidase subunit 7C, mitochondrial                 | 2  | -0.63 | 0.01 |
| COX6C                        | P09669 | Cytochrome c oxidase subunit 6C                                | 4  | -0.62 | 0.01 |
| COX6B1                       | P14854 | Cytochrome c oxidase subunit 6B1                               | 6  | -0.52 | 0.03 |
| COX5B                        | P16006 | Cytochrome c oxidase subunit 5B, mitochondrial                 | 7  | -0.51 | 0.02 |
| MT-CO2                       | P00403 | Cytochrome c oxidase subunit 2                                 | 7  | -0.51 | 0.02 |
| NDUFA4                       | O00483 | Cytochrome c oxidase subunit NDUFA4                            | 5  | -0.44 | 0.02 |
| COX4I1                       | P13073 | Cytochrome c oxidase subunit 4 isoform 1, mitochondrial        | 11 | -0.44 | 0.03 |
| COX5A                        | P20674 | Cytochrome c oxidase subunit 5A, mitochondrial                 | 7  | -0.37 | 0.08 |
| COX7A2                       | P14406 | Cytochrome c oxidase subunit 7A2, mitochondrial                | 2  | 0.01  | 0.99 |
| COX7A2L                      | O14548 | Cytochrome c oxidase subunit 7A-related protein, mitochondrial | 2  | 0.19  | 0.51 |
| <b>CIV assembly factors</b>  |        |                                                                |    |       |      |
| PET100                       | P0DJ07 | Protein PET100 homolog, mitochondrial                          | 2  | -0.02 | 0.94 |
| CMC1                         | Q7Z7K0 | COX assembly mitochondrial protein homolog                     | 1  | 0.03  | 0.91 |
| COA6                         | Q5JTT3 | Cytochrome c oxidase assembly factor 6 homolog                 | 2  | 0.10  | 0.49 |
| COA3                         | Q9Y2R0 | Cytochrome c oxidase assembly factor 3 homolog, mitochondrial  | 4  | 0.29  | 0.18 |
| CMC2                         | Q9NRP2 | COX assembly mitochondrial protein 2 homolog                   | 1  | 0.38  | 0.14 |
| COX19                        | Q49B96 | Cytochrome c oxidase assembly protein COX19                    | 3  | 0.38  | 0.00 |
| COX11                        | Q9Y6N1 | Cytochrome c oxidase assembly protein COX11, mitochondrial     | 3  | 0.58  | 0.01 |
| TIMM21                       | Q9BVV7 | Mitochondrial import inner membrane translocase subunit Tim21  | 5  | 0.62  | 0.01 |
| TACO1                        | Q9BSH4 | Translational activator of cytochrome c oxidase 1              | 4  | 0.68  | 0.01 |
| COX14                        | Q96136 | Cytochrome c oxidase assembly protein COX14                    | 1  | 0.74  | 0.02 |
| COA7                         | Q96BR5 | Cytochrome c oxidase assembly factor 7                         | 4  | 0.81  | 0.00 |
| SMIM20                       | Q8N5G0 | Small integral membrane protein 20                             | 1  | 0.84  | 0.03 |
| SCO1                         | O75880 | Protein SCO1 homolog, mitochondrial                            | 2  | 0.87  | 0.01 |
| SCO2                         | O43819 | Protein SCO2 homolog, mitochondrial                            | 3  | 0.98  | 0.01 |
| COX20                        | Q5RI15 | Cytochrome c oxidase assembly protein COX20, mitochondrial     | 2  | 1.14  | 0.01 |
| COX15                        | Q7KZN9 | Cytochrome c oxidase assembly protein COX15 homolog            | 2  | 1.34  | 0.01 |
| SURF1                        | Q15526 | Surfeit locus protein 1                                        | 3  | 1.55  | 0.00 |
| <b>CV subunits</b>           |        |                                                                |    |       |      |
| DMAC2L                       | Q99766 | ATP synthase subunit s, mitochondrial                          | 7  | 0.49  | 0.03 |
| ATP5MG                       | O75964 | ATP synthase subunit g, mitochondrial                          | 7  | 0.60  | 0.01 |
| MT-ATP6                      | P00846 | ATP synthase subunit a                                         | 2  | 0.62  | 0.01 |
| ATP5F1D                      | P30049 | ATP synthase subunit delta, mitochondrial                      | 3  | 0.68  | 0.00 |
| ATP5ME                       | P56385 | ATP synthase subunit e, mitochondrial                          | 5  | 0.71  | 0.00 |
| ATP5PB                       | P24539 | ATP synthase F(0) complex subunit B1, mitochondrial            | 13 | 0.73  | 0.00 |
| ATP5MF                       | P56134 | ATP synthase subunit f, mitochondrial                          | 2  | 0.74  | 0.00 |
| ATP5PD                       | O75947 | ATP synthase subunit d, mitochondrial                          | 11 | 0.75  | 0.00 |
| ATP5MC3                      | P48201 | ATP synthase F(0) complex subunit C3, mitochondrial            | 1  | 0.77  | 0.00 |
| ATP5F1B                      | P06576 | ATP synthase subunit beta, mitochondrial                       | 25 | 0.78  | 0.00 |
| ATP5PO                       | P48047 | ATP synthase subunit O, mitochondrial                          | 10 | 0.79  | 0.00 |
| ATP5F1A                      | P25705 | ATP synthase subunit alpha, mitochondrial                      | 36 | 0.79  | 0.00 |
| ATP5F1C                      | P36542 | ATP synthase subunit gamma, mitochondrial                      | 12 | 0.84  | 0.00 |
| MT-ATP8                      | P03928 | ATP synthase protein 8                                         | 1  | 0.94  | 0.01 |
| ATP5F1E                      | P56381 | ATP synthase subunit epsilon, mitochondrial                    | 3  | 0.98  | 0.00 |
| ATP5IF1                      | Q9UII2 | ATPase inhibitor, mitochondrial                                | 4  | 1.16  | 0.01 |
| ATP5PF                       | P18859 | ATP synthase-coupling factor 6, mitochondrial                  | 4  | 1.18  | 0.00 |
| <b>CV assembly factors</b>   |        |                                                                |    |       |      |
| ATPAF2                       | Q8N5M1 | ATP synthase mitochondrial F1 complex assembly factor 2        | 5  | 0.60  | 0.03 |
| FMC1                         | Q96HJ9 | Protein FMC1 homolog                                           | 2  | 0.86  | 0.02 |
| ATPAF1                       | Q5TC12 | ATP synthase mitochondrial F1 complex assembly factor 1        | 5  | 0.93  | 0.01 |

FDR values marked in grey are not significant ( $P > 0.05$ ); C, complex

**Supplementary Table 5.** List of proteins detected in fatty acid oxidation and citric acid cycle in the proteomic analysis

| Gene Symbol                       | UniProt Accession | Description                                                                 | Unique Peptides | log2 FC | FDR  |
|-----------------------------------|-------------------|-----------------------------------------------------------------------------|-----------------|---------|------|
| <b>Fatty Acid Oxidation (FAO)</b> |                   |                                                                             |                 |         |      |
| ACADS                             | P16219            | Short-chain specific acyl-CoA dehydrogenase, mitochondrial                  | 12              | -1.99   | 0.01 |
| ETFDH                             | Q16134            | Electron transfer flavoprotein-ubiquinone oxidoreductase, mitochondrial     | 15              | -1.08   | 0.00 |
| ACADSB                            | P45954            | Short/branched chain specific acyl-CoA dehydrogenase, mitochondrial         | 7               | -1.04   | 0.01 |
| ACADM                             | P11310            | Medium-chain specific acyl-CoA dehydrogenase, mitochondrial                 | 15              | -0.88   | 0.05 |
| ACSS1                             | Q9NUB1            | Acetyl-coenzyme A synthetase 2-like, mitochondrial                          | 9               | -0.08   | 0.84 |
| ACOT11                            | Q8WXI4            | Acyl-coenzyme A thioesterase 11                                             | 1               | 0.25    | 0.60 |
| ACSF2                             | Q96CM8            | Medium-chain acyl-CoA ligase ACSF2, mitochondrial                           | 11              | 0.28    | 0.02 |
| CROT                              | Q9UKG9            | Peroxisomal carnitine O-octanoyltransferase                                 | 1               | 0.28    | 0.54 |
| ACADVL                            | P49748            | Very long-chain specific acyl-CoA dehydrogenase, mitochondrial              | 37              | 0.36    | 0.25 |
| CRAT                              | P43155            | Carnitine O-acetyltransferase                                               | 23              | 0.41    | 0.03 |
| ECHS1                             | P30084            | Enoyl-CoA hydratase, mitochondrial                                          | 16              | 0.54    | 0.01 |
| MMUT                              | P22033            | Methylmalonyl-CoA mutase, mitochondrial                                     | 8               | 0.56    | 0.03 |
| ACAT1                             | P24752            | Acetyl-CoA acetyltransferase, mitochondrial                                 | 22              | 0.58    | 0.03 |
| ECI1                              | P42126            | Enoyl-CoA delta isomerase 1, mitochondrial                                  | 8               | 0.61    | 0.01 |
| ACACB                             | O00763            | Acetyl-CoA carboxylase 2 O                                                  | 10              | 0.74    | 0.00 |
| DECR1                             | Q16698            | 2,4-dienoyl-CoA reductase [(3E)-enoyl-CoA-producing], mitochondrial         | 14              | 0.89    | 0.00 |
| HADH                              | Q16836            | Hydroxyacyl-coenzyme A dehydrogenase, mitochondrial                         | 12              | 0.94    | 0.01 |
| MCEE                              | Q96PE7            | Methylmalonyl-CoA epimerase, mitochondrial                                  | 5               | 1.00    | 0.01 |
| ETFB                              | P38117            | Electron transfer flavoprotein subunit beta                                 | 16              | 1.10    | 0.00 |
| SLC25A20                          | O43772            | Mitochondrial carnitine/acylcarnitine carrier protein                       | 8               | 1.03    | 0.01 |
| HSD17B10                          | Q99714            | 3-hydroxyacyl-CoA dehydrogenase type-2                                      | 10              | 1.04    | 0.00 |
| CPT1B                             | Q92523            | Carnitine O-palmitoyltransferase 1, muscle isoform                          | 23              | 1.13    | 0.01 |
| ETFA                              | P13804            | Electron transfer flavoprotein subunit alpha, mitochondrial                 | 11              | 1.14    | 0.00 |
| ECI2                              | O75521            | Enoyl-CoA delta isomerase 2                                                 | 10              | 1.16    | 0.00 |
| CPT2                              | P23786            | Carnitine O-palmitoyltransferase 2, mitochondrial                           | 23              | 1.17    | 0.01 |
| ACSL1                             | P33121            | Long-chain-fatty-acid--CoA ligase 1                                         | 35              | 1.20    | 0.00 |
| PCCA                              | P05165            | Propionyl-CoA carboxylase alpha chain, mitochondrial                        | 18              | 1.31    | 0.01 |
| PCCB                              | P05166            | Propionyl-CoA carboxylase beta chain, mitochondrial                         | 12              | 1.33    | 0.01 |
| ACAA2                             | P42765            | 3-ketoacyl-CoA thiolase, mitochondrial                                      | 21              | 1.34    | 0.00 |
| HADHB                             | P55084            | Trifunctional enzyme subunit beta, mitochondrial                            | 27              | 1.73    | 0.00 |
| HADHA                             | P40939            | Trifunctional enzyme subunit alpha, mitochondrial                           | 40              | 1.78    | 0.00 |
| CPT1A                             | P50416            | Carnitine O-palmitoyltransferase 1, liver isoform                           | 4               | 2.17    | 0.00 |
| <b>Citric acid cycle (TCA)</b>    |                   |                                                                             |                 |         |      |
| DLD                               | P09622            | Dihydrolipoyl dehydrogenase, mitochondrial                                  | 14              | -1.15   | 0.01 |
| OGDH                              | Q02218            | 2-oxoglutarate dehydrogenase complex component E1                           | 42              | -0.49   | 0.03 |
| PC                                | P11498            | Pyruvate carboxylase, mitochondrial                                         | 1               | 0.35    | 0.03 |
| SLC25A11                          | Q02978            | Mitochondrial 2-oxoglutarate/malate carrier protein                         | 13              | 0.37    | 0.03 |
| L2HGDH                            | Q9H9P8            | L-2-hydroxyglutarate dehydrogenase, mitochondrial                           | 7               | 0.05    | 0.80 |
| ACLY                              | P53396            | ATP-citrate synthase                                                        | 6               | 0.26    | 0.29 |
| ME2                               | P23368            | NAD-dependent malic enzyme, mitochondrial                                   | 4               | 0.40    | 0.07 |
| IDH2                              | P48735            | Isocitrate dehydrogenase [NADP], mitochondrial                              | 26              | 0.51    | 0.01 |
| SUCLA2                            | Q9P2R7            | Succinate--CoA ligase [ADP-forming] subunit beta, mitochondrial             | 23              | 0.52    | 0.01 |
| MPC2                              | O95563            | Mitochondrial pyruvate carrier 2                                            | 1               | 0.62    | 0.14 |
| MDH2                              | P40926            | Malate dehydrogenase, mitochondrial                                         | 19              | 0.64    | 0.01 |
| MPC1                              | Q9Y5U8            | Mitochondrial pyruvate carrier 1                                            | 1               | 0.69    | 0.04 |
| DLST                              | P36957            | Dihydrolipoyllysine-residue succinyltransferase component of 2-oxoglutarate | 14              | 0.73    | 0.01 |
| SUCLG1                            | P53597            | Succinate--CoA ligase [ADP/GDP-forming] subunit alpha, mitochondrial        | 10              | 0.76    | 0.00 |
| ABHD11                            | Q8NFB4            | sn-1-specific diacylglycerol lipase ABHD11                                  | 3               | 0.79    | 0.00 |
| CS                                | O75390            | Citrate synthase, mitochondrial                                             | 16              | 0.79    | 0.00 |
| FAHD1                             | Q6P587            | Acylpyruvase FAHD1, mitochondrial                                           | 7               | 0.85    | 0.00 |
| IDH3B                             | O43837            | Isocitrate dehydrogenase [NAD] subunit beta, mitochondrial                  | 11              | 0.88    | 0.02 |
| FH                                | P07954            | Fumarate hydratase, mitochondrial                                           | 20              | 0.90    | 0.00 |
| ACO2                              | Q99798            | Aconitate hydratase, mitochondrial                                          | 41              | 0.94    | 0.00 |
| IDH3G                             | P51553            | Isocitrate dehydrogenase [NAD] subunit gamma, mitochondrial                 | 9               | 0.97    | 0.01 |
| IDH3A                             | P50213            | Isocitrate dehydrogenase [NAD] subunit alpha, mitochondrial                 | 16              | 0.99    | 0.01 |
| ME3                               | Q16798            | NADP-dependent malic enzyme, mitochondrial                                  | 5               | 1.00    | 0.00 |
| SUCLG2                            | Q96199            | Succinate--CoA ligase [GDP-forming] subunit beta, mitochondrial             | 19              | 1.56    | 0.00 |
| PCK2                              | Q16822            | Phosphoenolpyruvate carboxykinase [GTP], mitochondrial                      | 8               | 3.10    | 0.00 |

FDR values marked in grey are not significant (P>0.05)

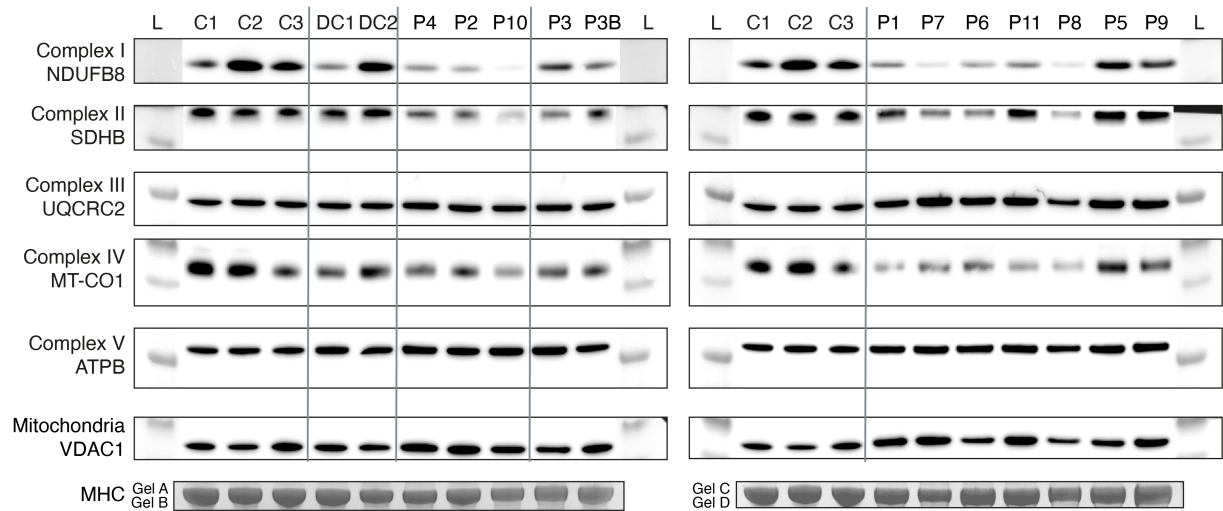

**Supplementary Fig 5.** Western blot analysis. The overall pattern showed a reduced amount of Complex I, II and IV, but no reduction of Complex III and V. The membranes were cut into pieces according to the size of the corresponding proteins to be able to incubate several antibodies on one blotted membrane. This was done for antibodies that are well-known to only show a band of correct molecular size. The figure of the western blot result is arranged from four agarose gels with equal amounts of loaded proteins derived from a single concentration measurement. L, Ladder; C, control; DC, disease control; (C and DC are specified in Supplementary Table 2); P, patients; MHC, Myosin heavy chain, Gel A and C, antibodies for ATPB, MT-CO1, NDUFB8, Gel B and D antibodies for UQCRC1, VDAC1, SDHB

### Pharmacogenetic analysis

Sertraline is metabolized by CYP enzymes and pharmacogenetic studies suggest that *CYP2C19* is the major metabolic enzyme. Since some variants are reported to affect the enzyme activity we analyzed the presence of these variants in our patients (star alleles \*). We included 11 variants in our analysis (Supplementary Table 6). We identified two of the variants in 6 of our patients, CYP2C19\*2 detected in 4 and CYP2C19\*17 in 2. Both variants are common in the population with more than 20 000 homozygous individuals detected for each variant in the gnomAD database.

**Supplementary Table 6.** Genetic analyses of individual Star alleles\* for CYP2C19 with effect on enzyme activity

| Allele | cDNA                     | Protein change | Effect on enzyme activity   | dbSNP rsID | gnomAD v4.1.0                                                             | 11 patients 22 alleles    |
|--------|--------------------------|----------------|-----------------------------|------------|---------------------------------------------------------------------------|---------------------------|
| *1     | None (wt)                |                | Normal (extensive) activity |            |                                                                           | 10/11<br>15/22            |
| *2     | c.681G>A                 | p.P227P        | No activity                 | rs4244285  | 234686/1464646 <sup>a</sup><br>1.60e-1 <sup>b</sup><br>20742 <sup>c</sup> | 4/11<br>5/22 <sup>d</sup> |
| *3     | c.636G>A                 | p.W212*        | No activity                 | rs4986893  | 4750/1613588 <sup>a</sup><br>0.002944 <sup>b</sup><br>214 <sup>c</sup>    | 0/22                      |
| *4     | c.1A>G                   | p.M1?          | No activity                 | rs28399504 | 3866/1613130 <sup>a</sup><br>2.40e-3 <sup>b</sup><br>16 <sup>c</sup>      | 0/22                      |
| *5     | c.1297C>T                | p.R433W        | No activity                 | rs56337013 | 28/1613634 <sup>a</sup><br>1.74e-5 <sup>b</sup><br>0 <sup>c</sup>         | 0/22                      |
| *6     | c.395G>A                 | p.R132Q        | No activity                 | rs72552267 | 489/1614044 <sup>a</sup><br>3.03e-4 <sup>b</sup><br>1 <sup>c</sup>        | 0/22                      |
| *7     | c.819+2T>A               | splice         | No activity                 | rs72558186 | 3/1535118 <sup>a</sup><br>1.95e-6 <sup>b</sup><br>0 <sup>c</sup>          | 0/22                      |
| *8     | c.358T>C                 | p.W120R        | No activity                 | rs41291556 | 3867/1614036 <sup>a</sup><br>2.40e-3 <sup>b</sup><br>12 <sup>c</sup>      | 0/22                      |
| *9     | c.431G>A                 | p.R144H        | Decreased activity          | rs17884712 | 1141/1614010 <sup>a</sup><br>7.07e-4 <sup>b</sup><br>7 <sup>c</sup>       | 0/22                      |
| *10    | c.680C>T                 | p.P227L        | Decreased activity          | rs6413438  | 354/1471456 <sup>a</sup><br>2.41e-4 <sup>b</sup><br>1 <sup>c</sup>        | 0/22                      |
| *17    | c.-806C>T                | promotor       | Enhanced activity           | rs12248560 | 30385/151940 <sup>a</sup><br>0.2000 <sup>b</sup><br>3261 <sup>c</sup>     | 2/11<br>2/22              |
| *35    | c.332-23A>G <sup>e</sup> | splice         | No activity                 | rs12769205 | 266140/1612890 <sup>a</sup><br>1.65e-1 <sup>b</sup><br>24492 <sup>c</sup> | 0/22                      |

Included Star alleles\* based on <https://www.mayocliniclabs.com/test-catalog/overview/610043#Clinical-and-Interpretive>, *CYP2C19*; NM\_000769.1

<sup>a</sup> allele count/total allele number, <sup>b</sup> allele frequency, <sup>c</sup> number of homozygous, <sup>d</sup> together with c.332-23A>G, <sup>e</sup> in the absence of c.681G>A
